# Supplementary material for: The Function of Flavonoids in the Diurnal Rhythm under Rapidly Changing UV Conditions—A Model Study on Okra
Source: MDPI journal article supplement (doi:10.3390/plants10112268), 2021-10-22
Supplement: s1 [file s1]

## Experiment 1

+UV

-UV

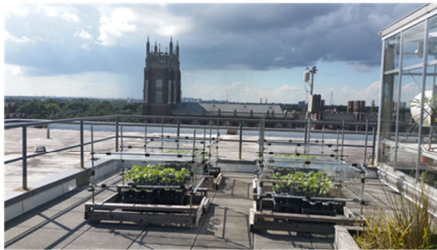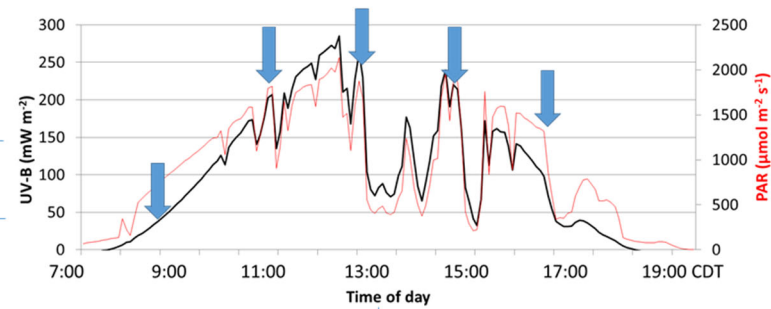

Plant morphology

Flavonoid content optically  
UV-shielding from extracts  
Antioxidant activity from extracts  
Soluble phenolics from extracts

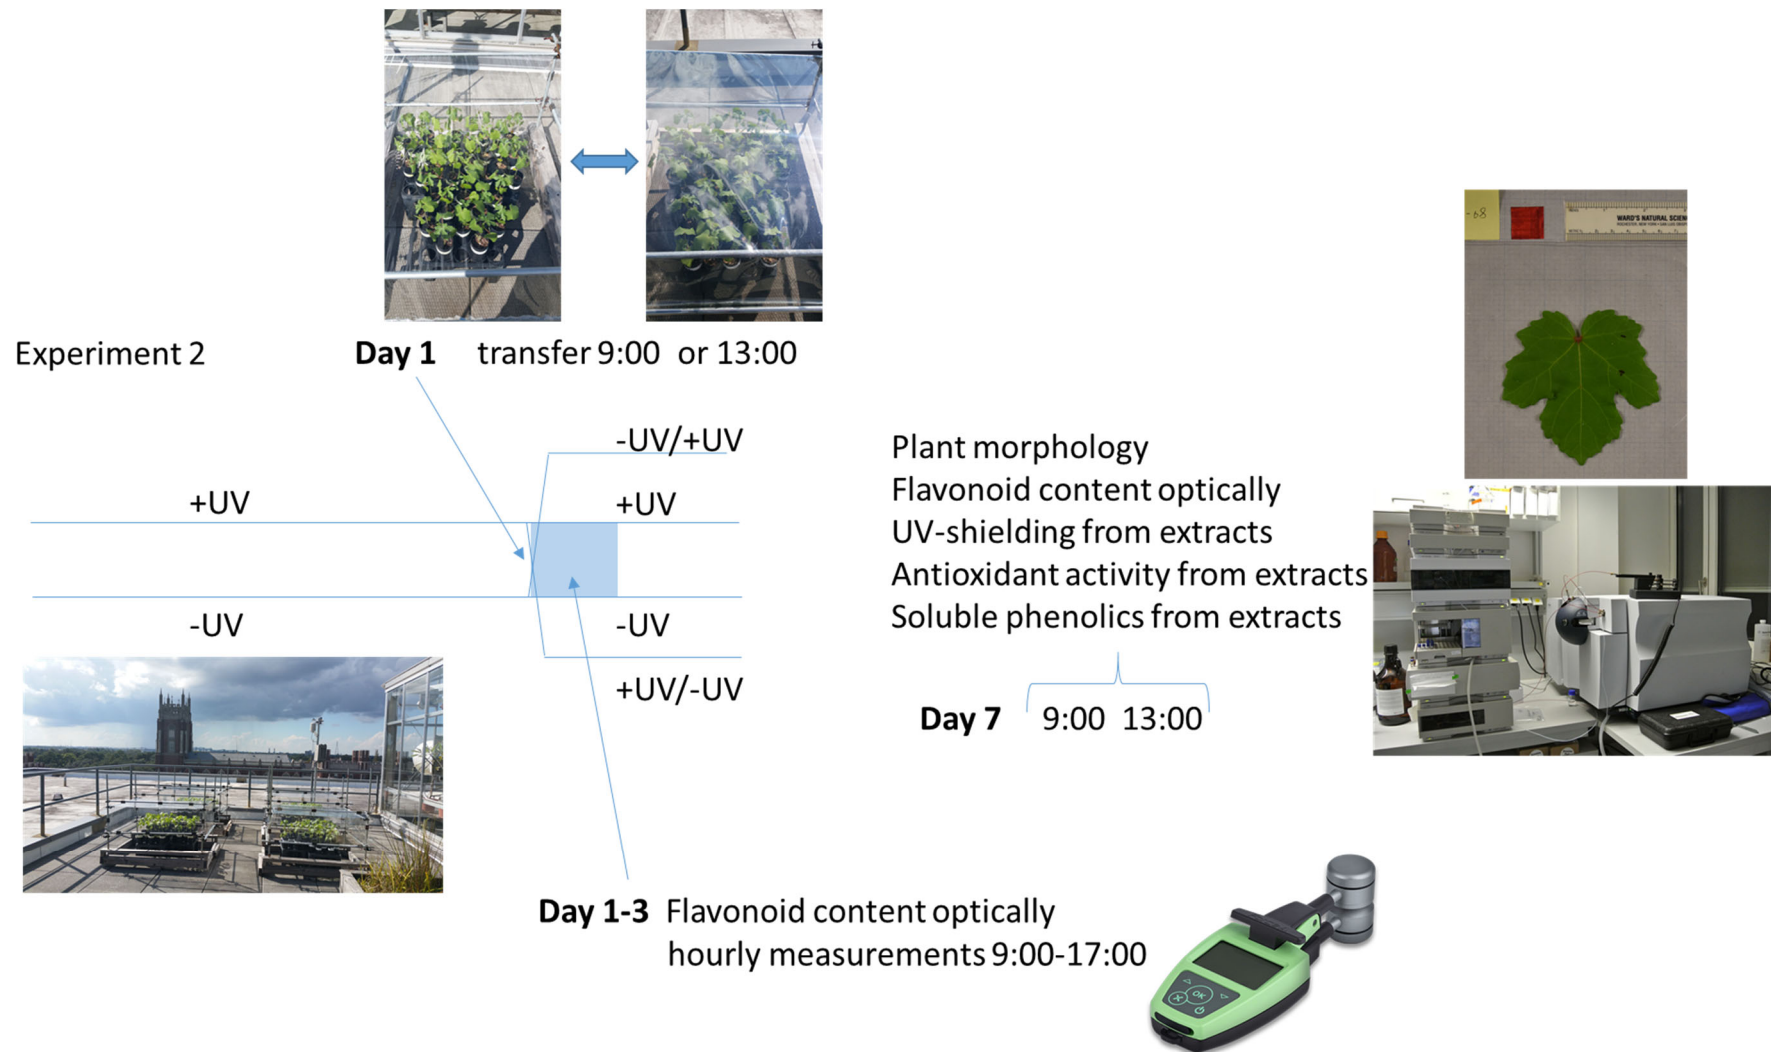

Fig S1: Experimental set up for experiment 1 (for studying the diurnal rhythm) and experiment 2 (for studying changes in the diurnal rhythm due to the transfer to the opposite UV condition).

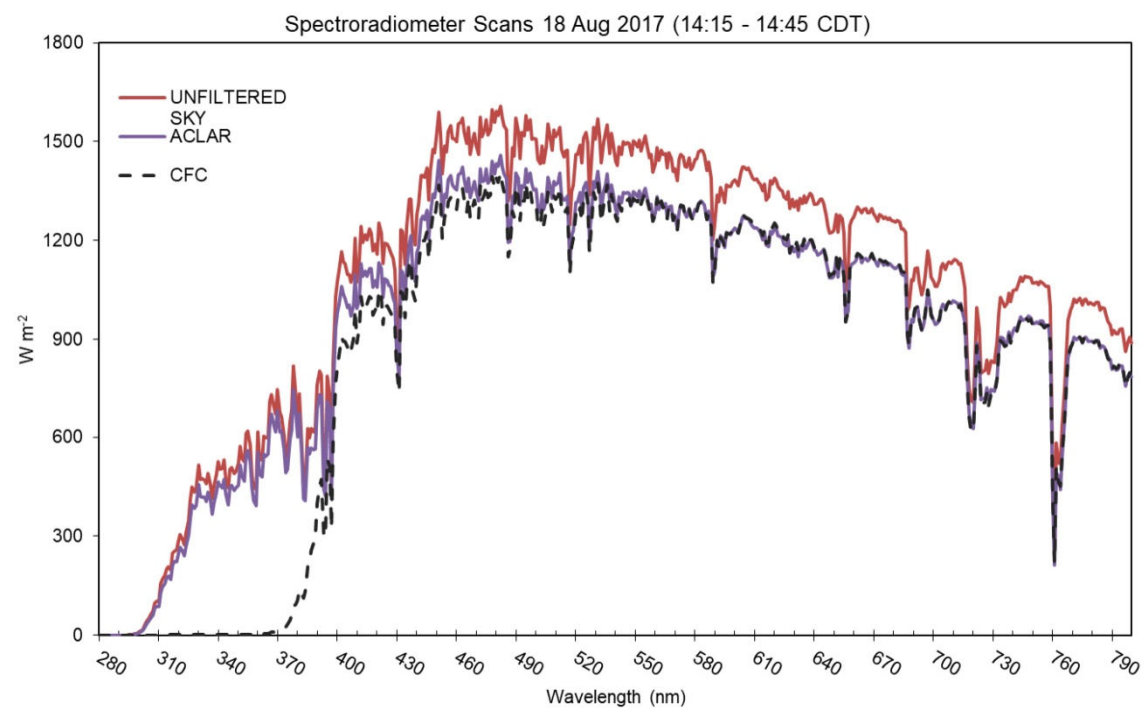

Figure S2. Representative clear-sky spectral irradiance for the +UV treatment (ACLAR film), -UV treatment (CFC) film and unfiltered solar radiation.

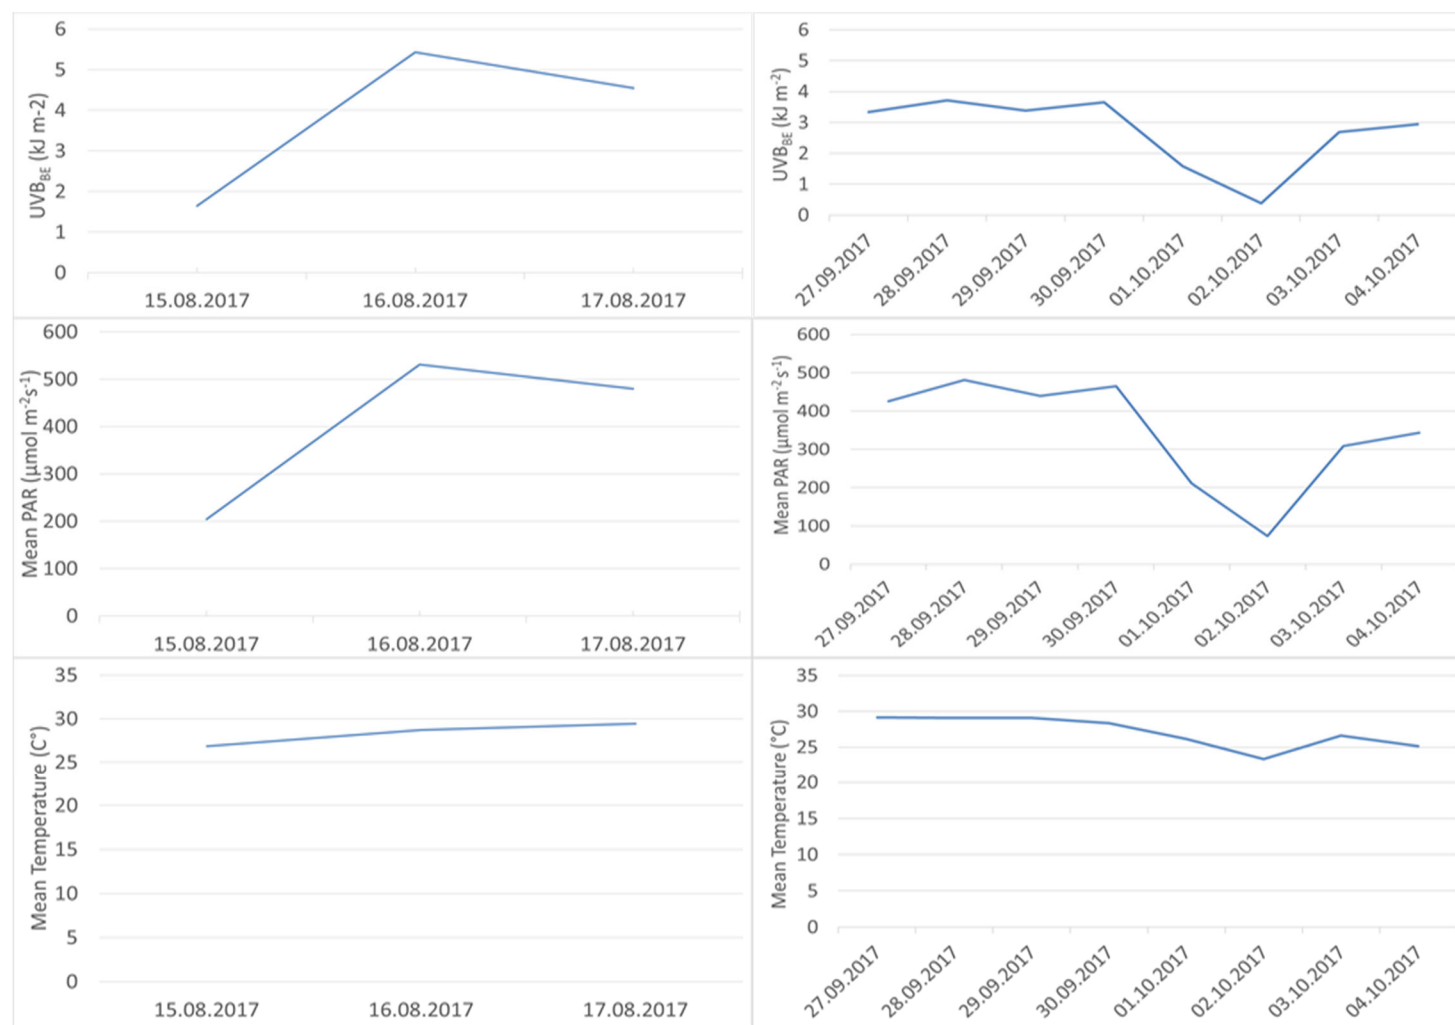

Fig S3: Environmental conditions during experiment 1 (left) and experiment 2 (right)
